# Supplementary material for: Rho/ROCK Inhibition Promotes TGF-β3-Induced Tenogenic Differentiation in Mesenchymal Stromal Cells
Source: Hindawi journal article supplement (doi:10.1155/2021/8284690), 2021-10-08

## Supplementary file 1: Human MSC characterization

Upper panel:

Representative images of Oil Red O staining (left) and von Kossa staining (right), showing adipogenic or osteogenic differentiation, respectively.

Lower panel:

Representative histograms for surface antigen expression analyzed by flow cytometry; antibody stainings and analyses were performed as detailed in Schubert et al., 2018 (doi: [10.1002/cyto.a.23240](https://doi.org/10.1002/cyto.a.23240)). The histograms display the relative number of events versus mean fluorescence intensity; blue represents Fixable E-Fluor® 780-stained MSC, red the MSC stained with the respective monoclonal antibody. For intracellular CD79 $\alpha$  staining, an additional isotype control staining (yellow) was used to determine the percentage of positive cells.

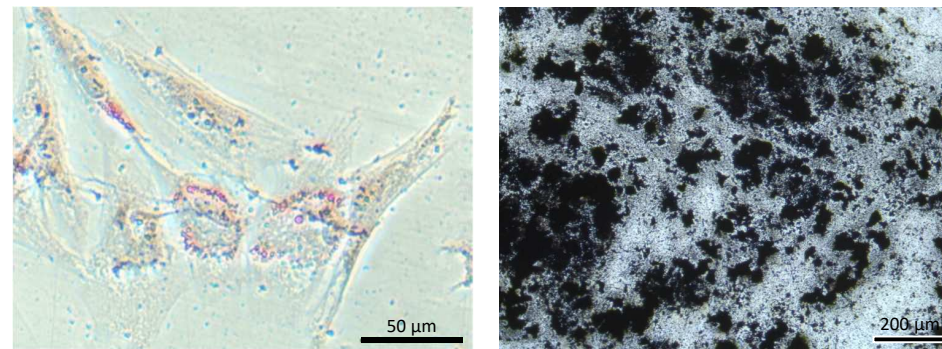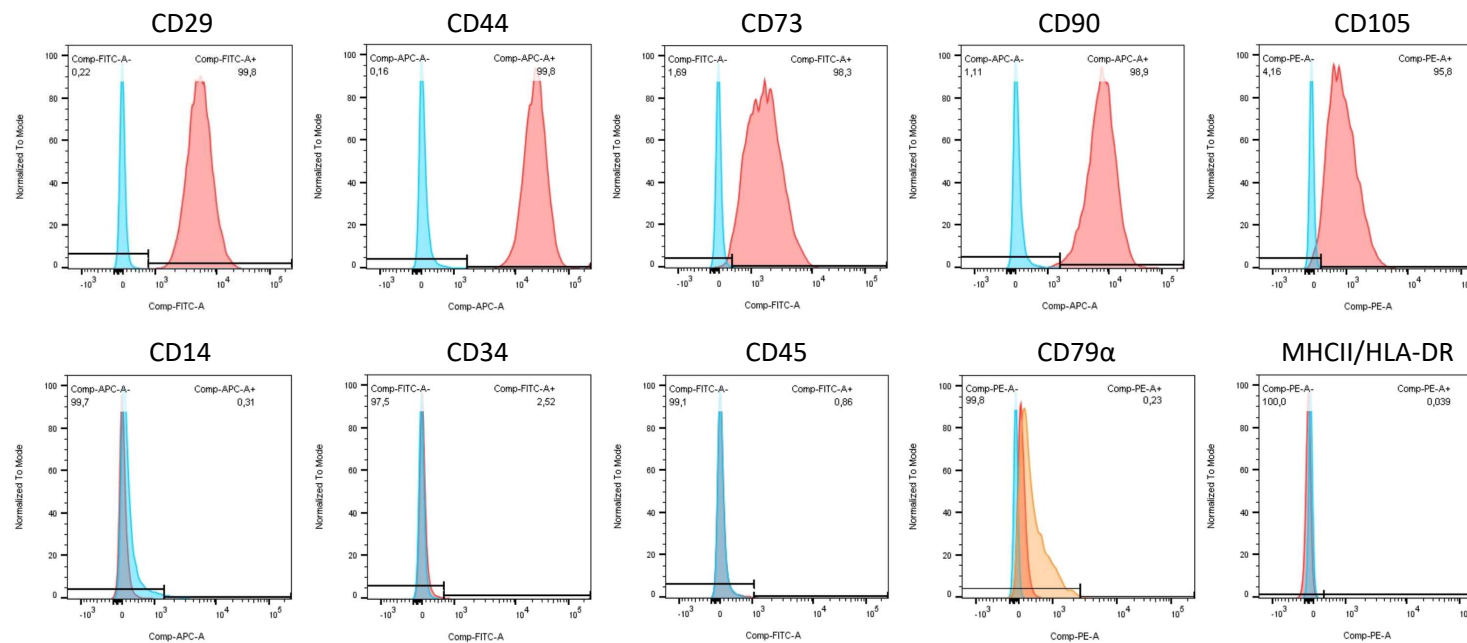

Supplement: f1 [file 8284690.f1.pdf]
